# Supplementary material
Source: PubMed Central journal article supplement (PMC5938158)
Supplement: NIHMS906505-supplement-Supplemental_Digital_Content.pdf [file NIHMS906505-supplement-Supplemental_Digital_Content.pdf]

## Supplemental Digital Appendix 1

### Complete Bibliography of Studies Included in Scoping Review (March 2017) of the “Hidden Curriculum” in Medical Education

*(Please note that the references are in alphabetical order and the sole responsibility of the authors.)*

1. Adkoli BV, Al-Umran KU, Al-Sheikh M, Deepak KK, Al-Rubaish AM. Medical students' perception of professionalism: A qualitative study from Saudi Arabia. *Medical teacher*. 2011;33(10):840.
2. Adler SR, Hughes EF, Scott RB. Student 'moles': revealing the hidden curriculum. *Medical education*. 2006;40(5):463-464.
3. Al-Abdulrazzaq D, Al-Fadhli A, Arshad A. Advanced medical students' experiences and views on professionalism at Kuwait University. *BMC medical education*. 2014;14:150.
4. Al-Bawardy R, Blatt B, Al-Shohaib S, Simmens SJ. Cross-cultural comparison of the patient-centeredness of the hidden curriculum between a Saudi Arabian and 9 US medical schools. *Medical education online*. 2009;14:19.
5. Anders S, Fischer-Bruegge D, Fabian M, Raupach T, Petersen-Ewert C, Harendza S. Teaching post-mortem external examination in undergraduate medical education—The formal and the informal curriculum. *Forensic Science International*. 7/15/ 2011;210(1–3):87-90.
6. Anderson DJ. The hidden curriculum. *American Journal of Roentgenology*. 1992;159(1):21-22.
7. Angoff NR, Duncan L, Roxas N, Hansen H. Power Day: Addressing the Use and Abuse of Power in Medical Training. *Journal of bioethical inquiry*. Jun 2016;13(2):203-213.
8. Aultman JM. Uncovering the hidden medical curriculum through a pedagogy of discomfort. *Advances in Health Sciences Education*. Aug 2005;10(3):263-273.
9. Austin JP. Trickle-down professionalism: hidden curriculum and the pediatric hospitalist. *Hospital pediatrics*. Jun 2015;5(6):352-354.

10. Baingana RK, Nakasujja N, Galukande M, Omona K, Mafigiri DK, Sewankambo NK. Learning health professionalism at Makerere University: an exploratory study amongst undergraduate students. *BMC medical education*. Nov 2010;10.
11. Baird J, Bracken K, Grierson LEM. The relationship between perceived preceptor power use and student empowerment during clerkship rotations: a study of hidden curriculum. *Medical education*. Jul 2016;50(7):778-785.
12. Baker M, Wrubel J, Rabow MW. Professional Development and the Informal Curriculum in End-of-Life Care. *Journal of Cancer Education*. Sep 2011 2011;26(3):444-450.
13. Balboni MJ, Bandini J, Mitchell C, et al. Religion, Spirituality, and the Hidden Curriculum: Medical Student and Faculty Reflections. *Journal of Pain and Symptom Management*. 2015;50(4):507-515.
14. Balmer DF, Hall E, Fink M, Richards BF. How Do Medical Students Navigate the Interplay of Explicit Curricula, Implicit Curricula, and Extracurricula to Learn Curricular Objectives? *Academic Medicine*. Aug 2013;88(8):1135-1141.
15. Bamber AR, Quince TA. The value of postmortem experience in undergraduate medical education: current perspectives. *Advances in Medical Education & Practice*. 2015;6:159-170.
16. Bandini J, Mitchell C, Epstein-Peterson ZD, et al. Student and Faculty Reflections of the Hidden Curriculum: How Does the Hidden Curriculum Shape Students' Medical Training and Professionalization? *American Journal of Hospice & Palliative Medicine*. Feb 2017;34(1):57-63.
17. Barnard D, Quill T, Hafferty FW, et al. Preparing the ground: Contributions of the Preclinical Years to Medical Education for Care Near the End of Life. *Academic Medicine*. 1999;74(5):499-505.
18. Bell SK, Krupat E, Fazio SB, Roberts DH, Schwartzstein RM. Longitudinal pedagogy: A successful response to the fragmentation of the third-year medical student clerkship experience. *Academic Medicine*. 2008;83(5):467-475.
19. Benbassat J. Undesirable features of the medical learning environment: a narrative review of the literature. *Advances in Health Sciences Education*. Aug 2013;18(3):527-536.

20. Bernard AW, Malone M, Kman NE, Caterino JM, Khandelwal S. Medical student professionalism narratives: A thematic analysis and interdisciplinary comparative investigation. *BMC Emergency Medicine*. 2011;11.
21. Bezemer J. Visual research in clinical education. *Medical education*. 2017;51(1):105-113.
22. Billings ME, Engelberg R, Curtis JR, Block S, Sullivan AM. Determinants of Medical Students' Perceived Preparation To Perform End-of-Life Care, Quality of End-of-Life Care Education, and Attitudes Toward End-of-Life Care. *Journal of Palliative Medicine*. Mar 2010;13(3):319-326.
23. Block SD. Medical education in end-of-life care: the status of reform. *Journal of palliative medicine*. Apr 2002;5(2):243-248.
24. Borgstrom E, Cohn S, Barclay S. Medical Professionalism: Conflicting Values for Tomorrow's Doctors. *Journal of general internal medicine*. Dec 2010 2010;25(12):1330-1336.
25. Brainard AH, Brislen HC. Viewpoint: Learning professionalism: A view from the trenches. *Academic Medicine*. Nov 2007;82(11):1010-1014.
26. Branch W.T, Jr., Kern D, Haidet P, et al. Teaching the human dimensions of care in clinical settings. *Journal of the American Medical Association*. 2001;286(9):1067-1074.
27. Burton JL. The autopsy in modern undergraduate medical education: a qualitative study of uses and curriculum considerations. *Medical education*. Dec 2003;37(12):1073-1081.
28. Butani L, Plant J. Building Connections With Role Models Using an Appreciative Inquiry Approach. *Academic pediatrics*. 5// 2016;16(4):411-412.
29. Casapulla S, Longenecker R, Beverly EA. The Value of Clinical Jazz: Teaching Critical Reflection on, in, and Toward Action. *Family medicine*. May 2016;48(5):377-380.
30. Cheng LF, Yang HC. Learning about gender on campus: an analysis of the hidden curriculum for medical students. *Medical education*. Mar 2015;49(3):321-331.
31. Chretien K, Goldman E, Faselis C. The Reflective Writing Class Blog: Using Technology to Promote Reflection and Professional Development. *Journal of general internal medicine*. Dec 2008 2008;23(12):2066-2070.
32. Chretien KC. Teaching and learning moments: the other hidden curriculum. *Academic medicine : journal of the Association of American Medical Colleges*. Feb 2013;88(2):289.

33. Christianson CE, McBride RB, Vari RC, Olson L, Wilson HD. From traditional to patient-centered learning: Curriculum change as an intervention for changing institutional culture and promoting professionalism in undergraduate medical education. *Academic Medicine*. Nov 2007;82(11):1079-1088.
34. Chuang AW, Nuthalapaty FS, Casey PM, et al. To the point: reviews in medical education-taking control of the hidden curriculum. *American Journal of Obstetrics and Gynecology*. Oct 2010;203(4).
35. Cocks MMDP. The hidden curriculum. *Canadian Medical Association Journal*. 2014 Feb 04 2014;186(2):152.
36. Cottingham AH, Suchman AL, Litzelman DK, et al. Enhancing the informal curriculum of a medical school: A case study in organizational culture change. *Journal of general internal medicine*. 2008;23(6):715-722.
37. Cribb A, Bignold S. Towards the reflexive medical school: The hidden curriculum and medical education research. 1999:195-209.
38. Cushing AM. Learning patient-centred communication: The journey and the territory. *Patient Education & Counseling*. 2015;98(10):1236-1242.
39. D'Eon M, Lear N, Turner M, Jones C. Perils of the hidden curriculum revisited. *Medical teacher*. 2007;29(4):295-296.
40. Dobie S. Viewpoint: reflections on a well-traveled path: self-awareness, mindful practice, and relationship-centered care as foundations for medical education. *Academic medicine : journal of the Association of American Medical Colleges*. Apr 2007;82(4):422-427.
41. Doja A, Bould MD, Clarkin C, Eady K, Sutherland S, Writer H. The hidden and informal curriculum across the continuum of training: A cross-sectional qualitative study. *Medical teacher*. Aug 14 2015:1-9.
42. Doja A, Bould MD, Clarkin C, Eady K, Sutherland S, Writer H. The hidden and informal curriculum across the continuum of training: A cross-sectional qualitative study. *Medical teacher*. 2016;38(4):410-418.
43. Donnelly WJ. Patient-centered medical care requires a patient-centered medical record. *Academic Medicine*. Jan 2005;80(1):33-38.

44. Dwinnell B, Barley G. The hidden curriculum: a new undergraduate curriculum to evaluate students' perceptions of their third-year experiences. *Academic medicine : journal of the Association of American Medical Colleges*. May 2000;75(5):519.
45. Eikeland HL, Ornes K, Finset A, Pedersen R. The physician's role and empathy - a qualitative study of third year medical students. *BMC medical education*. Aug 2014;14.
46. Ellaway R. The informal and hidden curricula of mobile device use in medical education. *Medical teacher*. Jan 2014;36(1):89-91.
47. Ewen S, Mazel O, Knoche D. Exposing the Hidden Curriculum Influencing Medical Education on the Health of Indigenous People in Australia and New Zealand: The Role of the Critical Reflection Tool. *Academic Medicine*. Feb 2012;87(2):200-205.
48. Fallin-Bennett K. Implicit Bias Against Sexual Minorities in Medicine: Cycles of Professional Influence and the Role of the Hidden Curriculum. *Academic Medicine*. May 2015;90(5):549-552.
49. Fernandes R, Shore W, Muller JH, Rabow MW. What it's really like: The complex role of medical students in end-of-life care. *Teaching and learning in medicine*. Jan-Mar 2008;20(1):69-72.
50. Fins JJ, del Pozo PR. The hidden and implicit curricula in cultural context: New insights from Doha and New York. *Academic Medicine*. 2011;86(3):321-325.
51. Fins JJ, Gentileco BJ, Carver A, et al. Reflective practice and palliative care education: a clerkship responds to the informal and hidden curricula. *Academic medicine : journal of the Association of American Medical Colleges*. Mar 2003;78(3):307-312.
52. Fitz MM, Homan D, Reddy S, Griffith Iii CH, Baker E, Simpson KP. The hidden curriculum: Medical students' changing opinions toward the pharmaceutical industry. *Academic Medicine*. 2007;82(10 SUPPL.):S1-S3.
53. Gaufberg EH, Batalden M, Sands R, et al. The Hidden Curriculum: What Can We Learn From Third-Year Medical Student Narrative Reflections? 2010:1709.
54. Giffort DM, Underman K. The relationship between medical education and trans health disparities: a call to research. *Sociology Compass*. Nov 2016;10(11):999-1013.
55. Giles JA, Hill EJR. Examining our hidden curricula: powerful, visible, gendered and discriminatory. *Medical education*. 2015;49(3):244-246 243p.

56. Giubilini A, Milnes S, Savulescu J. The Medical Ethics Curriculum in Medical Schools: Present and Future. *The Journal of clinical ethics*. summer 2016;27(2):129-145.
57. Glick S. Progress in teaching physician-patient communication in medical school; personal observations and experience of a medical educator. *Rambam Maimonides medical journal*. Apr 2011;2(2):e0037.
58. Glicken AD, Merenstein GB. Addressing the hidden curriculum: understanding educator professionalism. *Medical teacher*. Feb 2007;29(1):54-57.
59. Gofton W, Regehr G. What we don't know we are teaching: unveiling the hidden curriculum. *Clinical orthopaedics and related research*. Aug 2006;449:20-27.
60. Goldie J. Review of ethics curricula in undergraduate medical education. *Medical education*. 2000;34(2):108-119.
61. Goldie J, Dowie A, Cotton P, Morrison J. Teaching professionalism in the early years of a medical curriculum: a qualitative study. *Medical education*. Jun 2007;41(6):610-617.
62. Goodman RL. Medical education and the pharmaceutical industry. *Perspectives in biology and medicine*. Winter 2007;50(1):32-39.
63. Gosselink MJ. Medical weblogs: Advocacy for positive cyber role models. *Clinical Teacher*. 2011;8(4):245-248.
64. Haas J, Shaffir W. Ritual Evaluation of Competence: The Hidden Curriculum of Professionalization in an Innovative Medical School Program. *Work and Occupations*. 1982;9(2):131-154.
65. Hafferty FW. Beyond Curriculum Reform: Confronting Medicine's Hidden Curriculum. 1998:403.
66. Hafferty FW, Franks R. The Hidden Curriculum, Ethics Teaching, and the Structure of Medical Education. 1994:861.
67. Hafferty FW, Gaufberg EH, O'Donnell JF. The role of the hidden curriculum in "on doctoring" courses. *AMA journal of ethics*. 2015;17(2):130-139.
68. Hafferty FW, Levinson D. Moving beyond nostalgia and motives: towards a complexity science view of medical professionalism. *Perspectives in Biology and Medicine*. Autumn Autumn 2008 2008;51(4):599-615.
69. Hafler JP, Ownby AR, Thompson BM, et al. Decoding the learning environment of medical education: a hidden curriculum perspective for faculty development. *Academic*

- medicine : journal of the Association of American Medical Colleges. Apr 2011;86(4):440-444.
70. Haidet P, Kelly A, Chou C, Culture Study G. Characterizing the patient-centeredness of hidden curricula in medical schools: Development and validation of a new measure. *Academic Medicine*. Jan 2005;80(1):44-50.
  71. Haidet P, Kelly PA, Bentley S, et al. Not the same everywhere: Patient-centered learning environments at nine medical schools. *Journal of general internal medicine*. 2006;21(5):405-409.
  72. Haidet P, Stein HF. The role of the student-teacher relationship in the formation of physicians: The hidden curriculum as process. *Journal of general internal medicine*. 2006;21(SUPPL. 1):S16-S20.
  73. Hall P, Byszewski A, Sutherland S, Stodel EJ. Developing a sustainable electronic portfolio (ePortfolio) program that fosters reflective practice and incorporates CanMEDS competencies into the undergraduate medical curriculum. *Academic medicine : journal of the Association of American Medical Colleges*. Jun 2012;87(6):744-751.
  74. Hattab AS. Current trends in teaching ethics of healthcare practices. *Developing World Bioethics*. 2004;4(2):160-172.
  75. Higashi RT, Tillack A, Steinman MA, Johnston CB, Harper GM. The ‘worthy’ patient: rethinking the ‘hidden curriculum’ in medical education. *Anthropology & Medicine*. 2013;20(1):13-23 11p.
  76. Higashi RT, Tillack AA, Steinman M, Harper M, Johnston CB. Elder care as “frustrating” and “boring”: Understanding the persistence of negative attitudes toward older patients among physicians-in-training. *Journal of Aging Studies*. 12// 2012;26(4):476-483.
  77. Hill E, Bowman K, Stalmeijer R, Hart J. You've got to know the rules to play the game: how medical students negotiate the hidden curriculum of surgical careers. *Medical education*. 2014;48(9):884-894 811p.
  78. Hodges BD, Kuper A. Theory and practice in the design and conduct of graduate medical education. *Academic medicine : journal of the Association of American Medical Colleges*. Jan 2012;87(1):25-33.

79. Holmes CL, Harris IB, Schwartz AJ, Regehr G. Harnessing the hidden curriculum: A four-step approach to developing and reinforcing reflective competencies in medical clinical clerkship. *Advances in Health Sciences Education*. 2014.
80. Holmes CL, Harris IB, Schwartz AJ, Regehr G. Harnessing the hidden curriculum: a four-step approach to developing and reinforcing reflective competencies in medical clinical clerkship. *Advances in health sciences education : theory and practice*. Dec 2015;20(5):1355-1370.
81. Hopkins L, Saciragic L, Kim J, Posner G. The Hidden Curriculum: Exposing the Unintended Lessons of Medical Education. *Cureus*. Oct 25 2016;8(10):e845.
82. Horowitz R, Gramling R, Quill T. Palliative care education in US medical schools. *Medical education*. 2014;48(1):59-66 58p.
83. Hundert EM. Characteristics of the informal curriculum and trainees' ethical choices. *Academic Medicine*. 1996;71(6):624-633.
84. Hundert EM, DouglasSteele D, Bickel J. Context in medical education: The informal ethics curriculum. *Medical education*. Sep 1996;30(5):353-364.
85. Hunt DD, Scott C, Zhong SP, Goldstein E. Frequency and effect of negative comments ("badmouthing") on medical students' career choices. *Academic Medicine*. Jun 1996;71(6):665-669.
86. Ioana C. Hidden influences on the moral growth of medical students - lessons from the medical English classroom. In: Laborda JC, Ozdamli F, Maasoglu Y, eds. 5th World Conference on Educational Sciences. Vol 1162014:3619-3623.
87. Jaye C, Egan T, Parker S. 'Do as I say, not as I do': Medical education and Foucault's normalizing technologies of self. *Anthropology and Medicine*. 2006;13(2):141-155.
88. Jerant A, Srinivasan M, Bertakis KD, Azari R, Pan RJ, Kravitz RL. Attributes affecting the medical school primary care experience. *Academic medicine : journal of the Association of American Medical Colleges*. Apr 2010;85(4):605-613.
89. Johnston JL, Elizabeth M, McGlade KJ, Keith S. Medical students' attitudes to professionalism: An opportunity for the GP tutor? *Education for Primary Care*. 2011;22(5):321-327.
90. Johnston WF, Rodriguez RM, Suarez D, Fortman J. Study of Medical Students' Malpractice Fear and Defensive Medicine: A 'Hidden Curriculum?'. *Western Journal of*



Emergency Medicine: Integrating Emergency Care with Population Health.

2014;15(3):293-298 296p.

91. Kahn P. The informal curriculum: a case study on tutor reflexivity, corporate agency and medical professionalism. *Teaching in Higher Education*. Aug 2013;18(6):631-642.
92. Kaiser F. The hidden curriculum. *Rawal Medical Journal*. 2015;40(3):253-254.
93. Karnieli-Miller O. Medical Students' Professionalism Narratives: A Window on the Informal and Hidden Curriculum: (vol 85, pg 124, 2010). *Academic Medicine*. Jan 2011;86(1):29-29.
94. Karnieli-Miller O, Vu TR, Frankel RM, et al. Which Experiences in the Hidden Curriculum Teach Students About Professionalism? *Academic Medicine*. Mar 2011;86(3):369-377.
95. Karunakaran I, Thirumalaikolundusubramanian P, Nalinakumari SD. A preliminary survey of professionalism teaching practices in anatomy education among Indian Medical Colleges. *Anatomical sciences education*. Feb 06 2017.
96. Kenison TC, Madu A, Krupat E, Ticona L, Vargas IM, Green AR. Through the Veil of Language: Exploring the Hidden Curriculum for the Care of Patients With Limited English Proficiency. *Academic Medicine*. Jan 2017;92(1):92-100.
97. Kesselheim AS. Drug company gifts to medical students: the hidden curriculum. *BMJ (Clinical research ed.)*. 2013;346:f1113.
98. Khan AZ. Non-Academic Attributes of Hidden Curriculum in Medical Schools. *Jcpsp- Journal of the College of Physicians and Surgeons Pakistan*. Jan 2013;23(1):5-9.
99. Kibble J, Hansen PA, Nelson L. Use of modified SOAP notes and peer-led small-group discussion in a Medical Physiology course: addressing the hidden curriculum. *Advances in physiology education*. Dec 2006;30(4):230-236.
100. King E, Chadwick N, Lee A, Keefe N, Nayyar R, Vatakencherry G. Benefits of an Informal Curriculum: Recruiting Medical Students Into Interventional Radiology. *Journal of the American College of Radiology*. 2015;12(9):965-967 963p.
101. Kittmer T, Hoogenes J, Pemberton J, Cameron BH. Exploring the hidden curriculum: a qualitative analysis of clerks' reflections on professionalism in surgical clerkship. *The American Journal of Surgery*. Apr 2013 2013;205(4):426.
102. Kommalage M. Hidden and informal curricula in medical schools: impact on the medical profession in Sri Lanka. *The Ceylon medical journal*. 2011;56(1):29-30.

103. Krupat E, Pelletier S, Alexander EK, Hirsh D, Ogur B, Schwartzstein R. Can changes in the principal clinical year prevent the erosion of students' patient-centered beliefs? *Academic medicine : journal of the Association of American Medical Colleges*. May 2009;84(5):582-586.
104. Lamiani G, Leone D, Meyer EC, Moja EA. How Italian students learn to become physicians: A qualitative study of the hidden curriculum. *Medical teacher*. 2011;33(12):989-996.
105. Lazarus MD, Kauffman GL, Kothari MJ, et al. Anatomy Integration Blueprint: A Fourth-Year Musculoskeletal Anatomy Elective Model. *Anatomical sciences education*. Sep-Oct 2014;7(5):379-388.
106. Lempp H, Seale C. The hidden curriculum in undergraduate medical education: Qualitative study of medical students' perceptions of teaching. 2004:770.
107. Lempp H, Seale C. Medical students' perceptions in relation to ethnicity and gender: a qualitative study. *BMC medical education*. 2006;6:17.
108. Liao JM, Thomas EJ, Bell SK. Speaking Up About The Dangers Of The Hidden Curriculum. *Health Affairs*. 2014;33(1):168-171 164p.
109. Lindberg O. Undergraduate socialization in medical education: ideals of professional physicians' practice. *Learning in Health & Social Care*. 2009;8(4):241-249 249p.
110. Litzelman DK, Cottingham AH. The new formal competency-based curriculum and informal curriculum at Indiana University School of Medicine: Overview and five-year analysis. *Academic Medicine*. Apr 2007;82(4):410-421.
111. Lu PY, Tsai JC, Tseng SY. Clinical teachers' perspectives on cultural competence in medical education. *Medical education*. Feb 2014;48(2):204-214.
112. MacLeod A. The hidden curriculum: is it time to re-consider the concept? *Medical teacher*. Jun 2014;36(6):539-540.
113. Madigosky WS, Headrick LA, Nelson K, Cox KR, Anderson T. Changing and sustaining medical students' knowledge, skills, and attitudes about patient safety and medical fallibility. *Academic Medicine*. Jan 2006;81(1):94-101.
114. Mahood SCMD. Medical education: Beware the hidden curriculum. *Canadian Family Physician*. Sep 2011 2011;57:983.
115. Marinker M. Myth, paradox and the hidden curriculum. 1997:293.

116. Martimianakis MA, Hafferty FW. Exploring the interstitial space between the ideal and the practised: humanism and the hidden curriculum of system reform. *Medical education*. Mar 2016;50(3):278-280.
117. Martimianakis MA, Michalec B, Lam J, Cartmill C, Taylor JS, Hafferty FW. Humanism, the Hidden Curriculum, and Educational Reform: A Scoping Review and Thematic Analysis. *Academic medicine : journal of the Association of American Medical Colleges*. Nov 2015;90(11 Suppl):S5-S13.
118. Masson C, Brazeau-Lamontagne L. Paradigms, emperor's clothes syndrome, and hidden curriculum: how do they affect joint, bone, and spine diseases? *Joint, bone, spine : revue du rhumatisme*. Dec 2006;73(6):581-583.
119. McCammon S, Brody H. How Virtue Ethics Informs Medical Professionalism. *HEC Forum*. 2012;24(4):257-272.
120. McLaughlin K, Coderre S, Woloschuk W, Lim T, Muruve D, Mandin H. The influence of objectives, learning experiences and examination blueprint on medical students' examination preparation. *BMC medical education*. 2005;5.
121. McNamee LS, O'Brien FY, Botha JH. Student perceptions of medico-legal autopsy demonstrations in a student-centred curriculum. *Medical education*. 2009;43(1):66-73 68p.
122. Meiboom A, Diedrich C, Vries HD, Hertogh C, Scheele F. The Hidden Curriculum of the Medical Care for Elderly Patients in Medical Education: A Qualitative Study. *Gerontology and Geriatrics Education*. 2015;36(1):30-44.
123. Michalec B. The pursuit of medical knowledge and the potential consequences of the hidden curriculum. *Health (London, England : 1997)*. May 2012;16(3):267-281.
124. Michalec B, Hafferty FW. Stunting professionalism: The potency and durability of the hidden curriculum within medical education. *Social Theory and Health*. 2013;11(4):388-406.
125. Montgomery A. The inevitability of physician burnout: Implications for interventions. *Burnout Research*. 6// 2014;1(1):50-56.
126. Morrison A, Roman B, Borges N. Psychiatry and Emergency Medicine: Medical Student and Physician Attitudes Toward Homeless Persons. *Academic Psychiatry*. May-Jun 2012;36(3):211-215.

127. Mullangi S. The Synergy of Medicine and Art in the Curriculum. *Academic Medicine*. Jul 2013;88(7):921-923.
128. Murakami M, Kawabata H, Maezawa M. The perception of the hidden curriculum on medical education: an exploratory study. *Asia Pacific Family Medicine*. 2009;8(1):1-7.
129. Murphy M. Hiding in Plain Sight: The Production of Heteronormativity in Medical Education. *Journal of Contemporary Ethnography*. Jun 2016;45(3):256-289.
130. Mutabdzic D, Azzie G. Uncovering the Hidden Curriculum of Global Health Electives. *Annals of surgery*. May 2016;263(5):853-854.
131. Neumann M, Edelhäuser F, Tauschel D, et al. Empathy decline and its reasons: A systematic review of studies with medical students and residents. *Academic Medicine*. 2011;86(8):996-1009.
132. O'Brien B C, Hirsh D, Krupat E, et al. Learners, performers, caregivers, and team players: Descriptions of the ideal medical student in longitudinal integrated and block clerkships. *Medical teacher*. Apr 20 2015:1-9.
133. O'Brien BC, Hirsh D, Krupat E, et al. Learners, performers, caregivers, and team players: Descriptions of the ideal medical student in longitudinal integrated and block clerkships. *Medical teacher*. Mar 2016;38(3):297-305.
134. O'Callaghan A. Emotional congruence in learning and health encounters in medicine: addressing an aspect of the hidden curriculum. *Advances in Health Sciences Education*. 2013;18(2):305-317 313p.
135. Olive KE, Abercrombie CL. Developing a Physician's Professional Identity Through Medical Education. *The American journal of the medical sciences*. 2// 2017;353(2):101-108.
136. Olthuis G, Dekkers W. Medical education, palliative care and moral attitude: Some objectives and future perspectives. *Medical education*. 2003;37(10):928-933.
137. Oser TK, Haidet P, Lewis PR, Mauger DT, Gingrich DL, Leong SL. Frequency and negative impact of medical student mistreatment based on specialty choice: a longitudinal study. *Academic medicine : journal of the Association of American Medical Colleges*. May 2014;89(5):755-761.
138. Ozolins I, Hall H, Peterson R. The Student Voice: Recognising the hidden and informal curriculum in medicine. *Medical teacher*. 2008;30(6):606-611.

139. Patel VL, Arocha JF, Shortliffe EH. Cognitive models in training health professionals to protect patients' confidential information. *International Journal of Medical Informatics*. 2000;60(2):143-150.
140. Paul D, Ewen SC, Jones R. Cultural competence in medical education: aligning the formal, informal and hidden curricula. *Advances in Health Sciences Education*. Dec 2014;19(5):751-758.
141. Phillips CB. Student portfolios and the hidden curriculum on gender: Mapping exclusion. *Medical education*. 2009;43(9):847-853.
142. Phillips SP. Blinded by belonging: revealing the hidden curriculum. *Medical education*. Feb 2013;47(2):124-125.
143. Phillips SP, Clarke M. More than an education: the hidden curriculum, professional attitudes and career choice. *Medical education*. Sep 2012;46(9):887-893.
144. Pingleton SK, Davis DA, Dickler RM. Characteristics of quality and patient safety curricula in major teaching hospitals. *American Journal of Medical Quality*. 2010;25(4):305-311 307p.
145. Plack MMPTE, Driscoll MP, Marquez MMD, Greenberg LMD. Peer-Facilitated Virtual Action Learning: Reflecting on Critical Incidents During a Pediatric Clerkship. *Academic pediatrics*. Mar/Apr Mar/Apr 2010 2010;10(2):146-152.
146. Rabow M, Gargani J, Cooke M. Do As I Say: Curricular Discordance in Medical School End-of-Life Care Education. *Journal of Palliative Medicine*. 2007;10(3):759-769.
147. Rabow MW, Remen RN, Parmelee DX, Inui TS. Professional Formation: Extending Medicine's Lineage of Service Into the Next Century. *Academic Medicine*. Feb 2010;85(2):310-317.
148. Ratanawongsa N, Teherani A, Hauer KE. Third-year medical students' experiences with dying patients during the internal medicine clerkship: A qualitative study of the informal curriculum. *Academic Medicine*. Jul 2005;80(7):641-647.
149. Reisman AB. Outing the Hidden Curriculum. *The Hastings Center Report*. Jul/Aug Jul/Aug 2006 2006;36(4):9.
150. Robbé IJ. Revealing the hidden curriculum and reducing cultural reproduction: Small steps on a long road. *Medical education*. 2014;48(9):846-848.

151. Roberts C, Daly M, Kumar K, Perkins D, Richards D, Garne D. A longitudinal integrated placement and medical students' intentions to practise rurally. *Medical education*. 2012;46(2):179-191 113p.
152. Roberts L, McCarty T, Obenshain S. Comprehensive performance examination gives insights into the "hidden curriculum". *Academic medicine : journal of the Association of American Medical Colleges*. 1999;74(5):597-598.
153. Robertson WJ. The Irrelevance Narrative: Queer (In)Visibility in Medical Education and Practice. *Medical anthropology quarterly*. Mar 15 2016.
154. Rodriguez RG, Mai D. The hidden curriculum. *Military medicine*. 2012;177(9):999-1001.
155. Rogers DA, Boehler ML, Roberts NK, Johnson V. Using the Hidden Curriculum to Teach Professionalism During the Surgery Clerkship. *Journal of Surgical Education*. 5// 2012;69(3):423-427.
156. Rohan-Minjares F, Alfero C, Kaufman A. How Medical Schools Can Encourage Students' Interest in Family Medicine. *Academic Medicine*. May 2015;90(5):553-555.
157. Rose GL, Rukstalis MR, Schuckit MA. Informal mentoring between faculty and medical students. *Academic Medicine*. Apr 2005;80(4):344-348.
158. Rosenbaum ME, Axelson R. Curricular disconnects in learning communication skills: What and how students learn about communication during clinical clerkships. *Patient Education & Counseling*. 2013;91(1):85-90.
159. Rowley BD, Baldwin Jr DC, Bay RC, Karpman RR, Bunch WH. Professionalism and professional values in orthopaedics. *Clinical Orthopaedics and Related Research*. 2000(378):90-96.
160. Russ-Sellers R, Blackwell TH. Emergency Medical Technician Training During Medical School: Benefits for the Hidden Curriculum. *Academic medicine : journal of the Association of American Medical Colleges*. Jan 31 2017.
161. Russell C, O'Neill D. Ethicists and clinicians: the case for collaboration in the teaching of medical ethics. *Irish medical journal*. Jan 2006;99(1):25-27.
162. Senior T. Writing the hidden curriculum. *British Journal of General Practice*. 2015;65(634):261.

163. Shapiro J, Lie D, Gutierrez D, Zhuang G. "That never would have occurred to me": A qualitative study of medical students' views of a cultural competence curriculum. *BMC medical education*. 2006;6.
164. Sharpless J, Baldwin N, Cook R, et al. The becoming: students' reflections on the process of professional identity formation in medical education. *Academic medicine : journal of the Association of American Medical Colleges*. Jun 2015;90(6):713-717.
165. Shattock L, Williamson H, Caldwell K, Anderson K, Peters S. 'They've just got symptoms without science': Medical trainees' acquisition of negative attitudes towards patients with medically unexplained symptoms. *Patient Education and Counseling*. May 2013;91(2):249-254.
166. Shorey JM, 2nd. Signal versus noise on the wards: what "messages" from the hidden curriculum do medical students perceive to be importantly meaningful? *Transactions of the American Clinical and Climatological Association*. 2013;124:36-45.
167. Singer PA. Strengthening the role of ethics in medical education. *Canadian Medical Association. Journal*. 2003 Apr 01 2003;168(7):854-855.
168. Slotnick HB, Kerbeshian LA, Heller PS. The Implicit Clinical Curriculum. *American Educational Research Journal*. 1985;22(3):389-402.
169. Smith-Han K, Martyn H, Barrett A, Nicholson H. That's not what you expect to do as a doctor, you know, you don't expect your patients to die." Death as a learning experience for undergraduate medical students. *BMC medical education*. Apr 2016;16.
170. Ssebunnya GM. Beyond the hidden curriculum: The challenging search for authentic values in medical ethics education. *South African Journal of Bioethics and Law*. 2013;6(2):48.
171. Stephenson AE, Adshead LE, Higgs RH. The teaching of professional attitudes within UK medical schools: Reported difficulties and good practice. *Medical education*. Nov 2006;40(11):1072-1080.
172. Stern DT. In search of the informal curriculum: When and where professional values are taught. *Academic Medicine*. 1998;73(10 SUPPL.):S28-S30.
173. Suchman AL, Williamson PR, Litzelman DK, et al. Toward an informal curriculum that teaches professionalism - Transforming the social environment of a medical school. *Journal of general internal medicine*. May 2004;19(5):501-504.

174. Taggart K. Medical education reform not 'just rhetoric'. *Medical Post*. 2011 Nov 22 2011;47(19):68-69.
175. Tekian A. Must the hidden curriculum be the 'black box' for unspoken truth? *Medical education*. 2009;43(9):822-823.
176. Thampy H, Gwynne C, Foulkes R, Codd R, Burling S. Teach professionalism. *Education for Primary Care*. 2012;23(4):297-299.
177. Thiedke C, Blue AV, Chessman AW, Keller AH, Mallin R. Student observations and ratings of preceptor's interactions with patients: the hidden curriculum. *Teaching and learning in medicine*. Fall 2004;16(4):312-316.
178. Turbes S, Krebs E, Axtell S. The hidden curriculum in multicultural medical education: The role of case examples. *Academic Medicine*. Mar 2002;77(3):209-216.
179. van de Pol MH, Lagro J, Koopman EL, Olde Rikkert MG, Fluit CR, Lagro-Janssen AL. Lessons learned from narrative feedback of students on a geriatric training program. *Gerontology & geriatrics education*. Feb 17 2016:1-14.
180. van Ryn M, Hardeman R, Phelan SM, et al. Medical School Experiences Associated with Change in Implicit Racial Bias Among 3547 Students: A Medical Student CHANGES Study Report. *Journal of general internal medicine*. Dec 2015;30(12):1748-1756.
181. van Ryn M, Hardeman R, Phelan SM, et al. Medical School Experiences Associated with Change in Implicit Racial Bias Among 3547 Students: A Medical Student CHANGES Study Report. *Journal of general internal medicine*. 2015.
182. Wachtler C, Troein M. A hidden curriculum: mapping cultural competency in a medical programme. *Medical education*. Oct 2003;37(10):861-868.
183. Wear D. On white coats and professional development: The formal and the hidden curricula. *Annals of Internal Medicine*. 1998;129(9):734.
184. Wear D, Skillicorn J. Hidden in Plain Sight: The Formal, Informal, and Hidden Curricula of a Psychiatry Clerkship. *Academic Medicine*. Apr 2009;84(4):451-458.
185. Webster F, Rice K, Dainty KN, Zwarenstein M, Durant S, Kuper A. Failure to cope: The hidden curriculum of emergency department wait times and the implications for clinical training. *Academic Medicine*. 2015;90(1):56-62.
186. West CP, Shanafelt TD. The influence of personal and environmental factors on professionalism in medical education. *BMC medical education*. 2007;7.



187. Whelan A, Leddy JJ, Mindra S, Matthew Hughes JD, El-Bialy S, Ramnanan CJ. Student perceptions of independent versus facilitated small group learning approaches to compressed medical anatomy education. *Anatomical sciences education*. Jan-Feb 2016;9(1):40-51.
188. White CB, Kumagai AK, Ross PT, Fantone JC. A qualitative exploration of how the conflict between the formal and informal curriculum influences student values and behaviors. *Academic medicine : journal of the Association of American Medical Colleges*. May 2009;84(5):597-603.
189. White CB, Perlman RL, Fantone JC, Kumagai AK. The interpretive project: A creative educational approach to fostering medical students' reflections and advancing humanistic medicine. *Reflective Practice*. 2010;11(4):517-527.
190. White J, Brownell K, Lemay JF, Lockyer JM. "What Do They Want Me To Say?" The hidden curriculum at work in the medical school selection process: a qualitative study. *BMC medical education*. Mar 2012;12.
191. Wilkinson TJ. Stereotypes and the hidden curriculum of students. *Medical education*. 2016;50(8):802-804.
192. Williams D. Cracking the code on the "hidden curriculum" in the medical education pipeline and its contribution to attrition. *Journal of Unschooling and Alternative Learning*. 2016;10(19):82-99.
193. Wiseman L, Bradwejn J, Westbroek EM. A new leadership curriculum: the multiplication of intelligence. *Academic medicine : journal of the Association of American Medical Colleges*. Mar 2014;89(3):376-379.
194. Witman Y. What do we transfer in case discussions? The hidden curriculum in medicine. *Perspectives on medical education*. Apr 2014;3(2):113-123.
195. Wong A, Trollope-Kumar K. Reflections:an inquiry into medical students' professional identity formation. *Medical education*. May 2014;48(5):489-501.
196. Wong JJ, Di Loreto L, Kara A, et al. Assessing the change in attitudes, knowledge, and perspectives of medical students towards chiropractic after an educational intervention. *Journal of Chiropractic Education (Allen Press Publishing Services Inc.)*. 2014;28(2):112-122 111p.

197. Zhang JZ, Peterson RF, Ozolins IZ. Student approaches for learning in medicine: What does it tell us about the informal curriculum? BMC medical education. Oct 2011;11.
